# Supplementary material for: Ethanol Extract of Ampelopsis brevipedunculata Rhizomes Suppresses IgE-Mediated Mast Cell Activation and Anaphylaxis
Source: Adv Pharmacol Pharm Sci. 2024 Apr 4;2024:5083956. doi: 10.1155/2024/5083956 (PMC11008974; doi:10.1155/2024/5083956)
Supplement: Supplementary Materials — Supplementary material consists of the additional methods and the detailed information of primer sequences and antibodies used in this study. [file 5083956.f1.docx]

**Supplementary material**

**Materials and Methods**

*ABE preparation and identification*

*A. brevipedunculata* rhizome were procured from an herbal store in Seoul, Republic of Korea (A voucher specimen KRIBB-KR2013-1). We previously showed that procedure of *A. brevipedunculata* extraction and the structures identification of components using spectroscopic analyses [1]. Briefly, the dried and pulverized materials were extracted with 95% ethanol and evaporated in vacuo. The yield of ABE was approximately 3.7%. To verify the component structure, the extract was suspended in H2O, progressively partitioned with ethyl acetate, separated using silica gel column chromatography. Seventeen compounds were yielded using MPLC (C18 and silica gel) and semi-preparative HPLC. The NMR data of isolated compounds and reported literature data confirmed the ABE components.

*Cell viability*

Cell viability was assessed using a MTT assay (WelGENE, Seoul, Republic of Korea) as previously described. RBL-2H3 (6 × 104 cells/well in a 96-well plate) were incubated with ABE (1, 10, 100, and 1,000 µg/mL) for 12 h, and MTT reagent (1 mg/mL) was added. After 2 h, the formed formazan crystals were dissolved by dimethyl sulfoxide. The absorbance was measured at a wavelength of 570 nm using a spectrophotometer (Molecular Devices).

*Histamine and β-hexosaminidase assay*

For sensitization, RBL-2H3 (5 × 105 cells/well in a 12-well plate) were incubated overnight with IgE (50 ng/mL) and treated with ABE (60 µg/mL), catechin, gallic acid, resveratrol, or Dex (10 µM). After 1 h, the cells were treated with DNP-HSA (100 ng/mL) for 4 h. The culture media were collected, and attached cells were dissolved in 0.5% Triton X-100. Histamine levels were determined according to a previously described method [2]. First, 0.1 N HCl and 60% perchloric acid were mixed with the cultured media, which were then centrifuged. The supernatant was transferred to fresh a tube, and 5 M NaCl, 5 N NaOH, and *n*-butanol were added before the second centrifugation. Next, 0.1 N HCl and *n*-heptane were mixed with the supernatant. Histamine was quantified using *o*-phthaldialdehyde spectrofluorometry. β-hexosaminidase release was measured according to the procedure described in a previous study [3]. Briefly, 40 µL of media and cell lysate was incubated at 37ºC for 1 h with substrate buffer, and the absorbance was measured at 405 nm using a spectrophotometer (Molecular Devices).

*ELISA*

Serum IgE and cytokine levels were determined by ELISA. Anti-DNP IgE (50 ng/mL)-sensitized RBL-2H3 (5 × 105 cells/well in a 12-well plate) were pretreated with ABE (10, 30, or 60 µg/mL) or Dex (10 µM) and stimulated with DNP-HSA (100 ng/mL) for 6 h. The concentration of target proteins was evaluated using specific kits (BD Biosciences, San Diego, CA, USA) following the manufacturer’s instructions. In case of OVA-specific IgE, OVA (20 µg/mL) was used instead of capture antibody.

**Supplementary Tables**

**Table S1.** Primers sequences used in qPCR.

| Primer | Sequence 5'→3' | GenBank accession number |
| --- | --- | --- |
| β-actin | F: GAAGCTGTGCTATGTTGCCCTAGA | NM_031144.3 |
| R: GTACTCCTGCTTGCTGATCCACAT |
| TNF-α | F: TCCCAAATGGGCTCCCTCTC | NM_012675.3 |
| R: AAATGGCAAACCGGCTGACG |
| IL-4 | F: TGCACCGAGATGTTTGTACCAGA | NM_201270.1 |
| R: TTGCGAAGCACCCTGGAAG |

F, forward; R, reverse.

**Table S2.** Antibodies used for Western blot.

| Target | Supplier | Cat. No. | Size (kDa) | Host | Dilution |
| --- | --- | --- | --- | --- | --- |
| NF-κB | Santa Cruz | sc-109 | 65 | Rabbit | 1:1000 |
| IκBα | Santa Cruz | sc-371 | 27 | Rabbit | 1:1000 |
| β-actin | Santa Cruz | sc-8432 | 42 | Mouse | 1:1000 |
| Lamin B1 | Santa Cruz | sc-6217 | 65 | Goat | 1:1000 |
| Rabbit IgG | Cell Signaling | 7074S |  | Goat | 1:2000 |
| Mouse IgG | Cell Signaling | 7076S |  | Horse | 1:2000 |
| Goat IgG | Santa Cruz | sc-2354 |  | Mouse | 1:2000 |

**
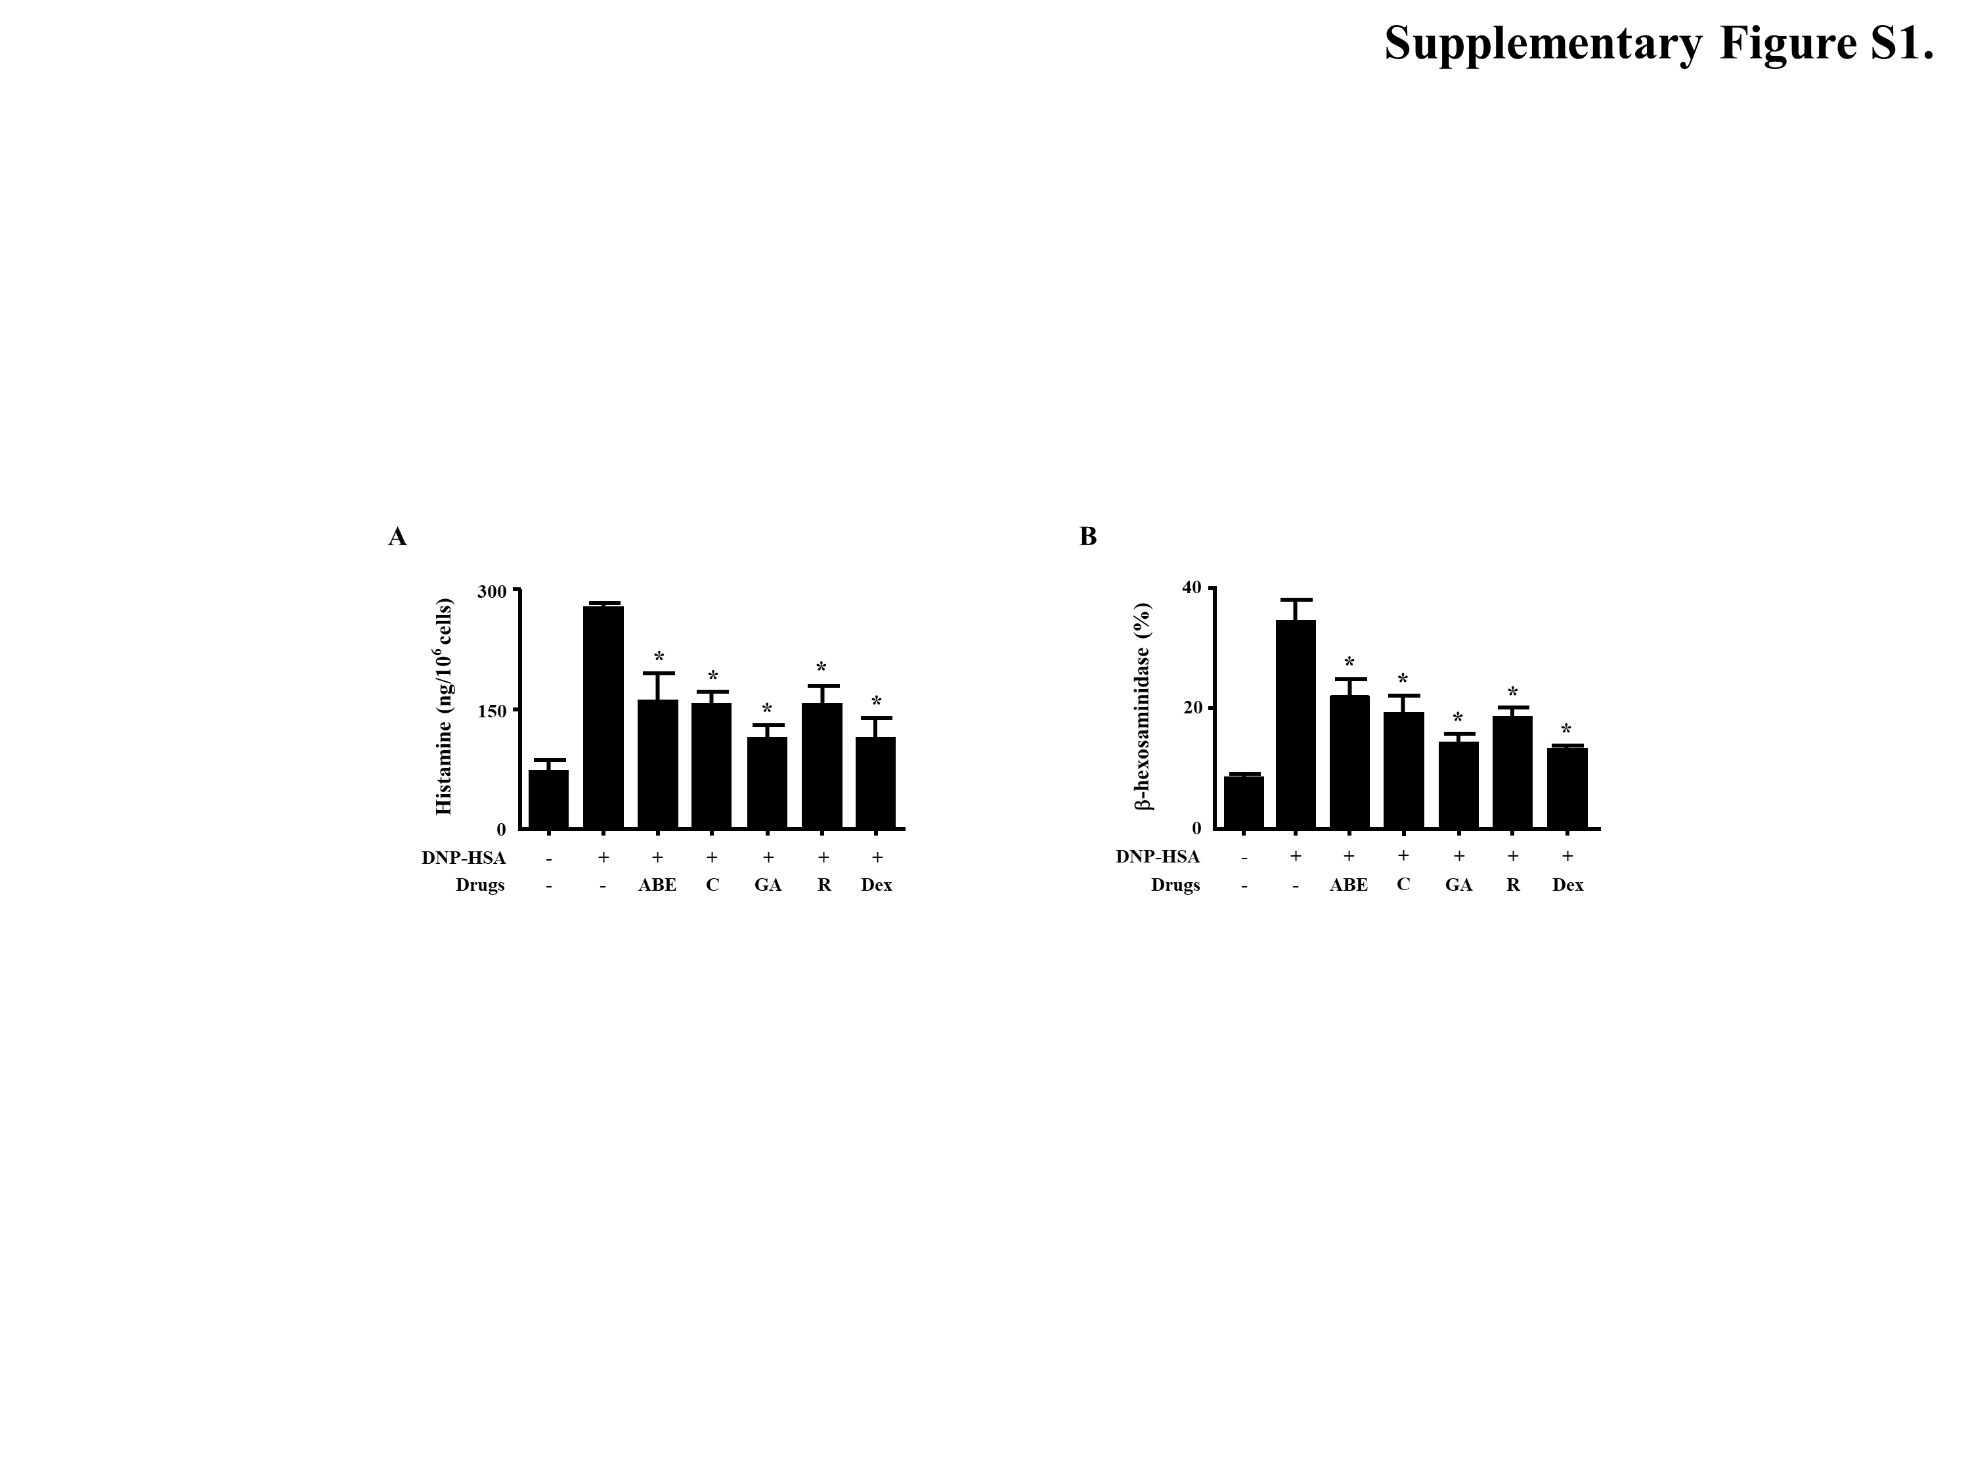
Supplementary Figure**

**FIGURE S1.** Comparison of the effects of ABE and its components in mast cells.

Anti-DNP IgE-sensitized mast cells were pretreated with/without ABE (60 μg/mL) or its components (C, GA, R, or Dex; 10 μM) for 1 h. RBL-2H3 were stimulated with DNP-HSA for 4 h. The released histamine was purified and detected using a fluorescent plate reader. The percentage of β-hexosaminidase release was calculated. The graph data represent the mean ± SEM. **p* < 0.05 compared with the DNP-HSA-stimulated group. ABE: Ethanol extract of *A. brevipedunculata* rhizomes, C: catechin, GA: gallic acid, R: resveratrol, Dex: dexamethasone.

**Reference**

1. Choi, Y.A., J.H. Yu, H.D. Jung, S. Lee, P.H. Park, H.S. Lee, T.K. Kwon, T.Y. Shin, S.W. Lee, M.C. Rho, Y.H. Jang, and S.H. Kim, Inhibitory effect of ethanol extract of *Ampelopsis brevipedunculata* rhizomes on atopic dermatitis-like skin inflammation. J. Ethnopharmacol., 2019. **238**: p. 111850.

2. Dhakal, H., E.J. Yang, S. Lee, M.J. Kim, M.C. Baek, B. Lee, P.H. Park, T.K. Kwon, D. Khang, K.S. Song, and S.H. Kim, Avenanthramide C from germinated oats exhibits anti-allergic inflammatory effects in mast cells. Sci. Rep., 2019. **9**(1): p. 6884.

3. Kim, M.J., I.G. Je, J. Song, X. Fei, S. Lee, H. Yang, W. Kang, Y.H. Jang, S.Y. Seo, and S.H. Kim, SG-SP1 suppresses mast cell-mediated allergic inflammation *via* inhibition of FcεRI signaling. Front. Immunol., 2020. **11**: p. 50.
